# Supplementary material for: Label-free electrochemical immunosensor based on biocompatible nanoporous Fe3O4and biotin–streptavidin system for sensitive detection of zearalenone
Source: Royal Society of Chemistry journal article supplement (doi:10.1039/c9an02543j), 2020-01-01
Supplement: c9an02543j1.pdf [file c9an02543j1.pdf]

*Supplementary materials*

**Label-free electrochemical immunosensor based on biocompatible  
nanoporous Fe<sub>3</sub>O<sub>4</sub> and biotin-streptavidin system for sensitive  
detection of zearalenone**

Yaoguang Wang<sup>a,b</sup>, Guanhui Zhao<sup>c</sup>, Huan Wang<sup>c</sup>, Yong Zhang<sup>c</sup>, Nuo Zhang<sup>c</sup>, Dong  
Wei<sup>b</sup>, Rui Feng<sup>b,c\*</sup>, Qin Wei<sup>c\*</sup>

<sup>a</sup> Shandong Provincial Key Laboratory of Molecular Engineering, School of Chemistry and Pharmaceutical Engineering, Qilu University of Technology (Shandong Academy of Sciences), Jinan 250353, China

<sup>b</sup> School of Water Conservancy and Environment, University of Jinan, Jinan 250022, China

<sup>c</sup> Collaborative Innovation Center for Green Chemical Manufacturing and Accurate Detection, Key Laboratory of Interfacial Reaction & Sensing Analysis in Universities of Shandong, School of Chemistry and Chemical Engineering, University of Jinan, Jinan 250022, China

\*Corresponding author. Tel. +86 531 82767872; fax: +86 531 82767367.

E-mail address: ruifeng\_ujn@163.com (R. Feng); sdjndxwq@163.com (Q. Wei).

## Materials and methods

**Reagents.**  $\text{FeCl}_3 \cdot 6\text{H}_2\text{O}$ , ethylene glycol, sodium acetate, ethanediamine, ninhydrin, glutaraldehyde solution, N-hydroxysuccinimide ester (biotin-NHS), streptavidin, biotin, bovine serum albumin (BSA) (96-99%),  $\text{NaHCO}_3$  and dimethyl formamide (DMF) were obtained from Sigma-Aldrich company.  $\text{K}_3\text{Fe}(\text{CN})_6$  and glutaraldehyde (GA) used in this study were purchased from Sinopharm Chemical Reagent Ltd Co. (Beijing, China). Zearalenone monoclonal antibody (anti-ZEN, Ab) and ZEN (99.07%) were purchased from Beijing Wanger Biotechnology Co., Ltd (Beijing, China). A stock solution mixture of ZEN ( $0.1 \text{ mg} \cdot \text{mL}^{-1}$ ) was prepared in methanol and stored at  $4^\circ\text{C}$  in an amber glass volumetric flask. Working mixed standards were prepared by transferring 1 mL of stock solution mixture to separate vials and evaporating to dryness under a dry stream of nitrogen. Phosphate-buffered solutions (PBS,  $0.13 \text{ mol} \cdot \text{L}^{-1}$ ) at various pH values were prepared by mixing the stock solutions of  $0.1 \text{ mol} \cdot \text{L}^{-1} \text{KH}_2\text{PO}_4$  and  $0.1 \text{ mol} \cdot \text{L}^{-1} \text{Na}_2\text{HPO}_4$  at different volume ratios to appropriate pH value. PBS was used as electrolyte for all electrochemical measurements. Ultrapure water was used throughout the experiment. All other chemicals were of analytical reagents grade and used without further purification. Human urine samples were supplied by volunteers and informed consent was obtained from all human subjects.

**Apparatus.** All electrochemical measurements were performed on a CHI760D electrochemical workstation (Shanghai CH Instruments Co., China). The Electrochemical impedance spectroscopy (EIS) was measured with a Model IM6e (Zahner Elektrik, Germany). Transmission electron microscope (TEM) images were obtained from a Hitachi H-800 microscope (Japan). UV/Vis measurements were carried out by using a Lambda 35 UV/Vis Spectrometer

(PerkinElmer, USA). Surface area measurements were performed on Micromeritics ASAP 2020 surface area and porosity analyzer (Quantachrome, United States). The samples were out-gassed overnight (12 h) under nitrogen prior to adsorption measurement. YM-10 columns were purchased from Millipore (USA). X-Ray Powder Diffraction (XRD) pattern was acquired by a D8 FOCUS X-ray diffraction spectrometer (Bruker, German) with a Cu K $\alpha$  target at a scan rate of 0.03° 2 $\theta$  s<sup>-1</sup> from 10° to 80°. X-ray photoelectron spectroscopy (XPS) analysis was performed on ESCALAB 250 X-ray photoelectron spectrometer with an Al K $\alpha$  radiation source (1486.6 eV). Fourier transform infrared spectroscopy (FTIR) spectra were carried out by using KBr pellet in the range of 4000-450 cm<sup>-1</sup> on Spectrum One FTIR Spectrometer (PerkinElmer).

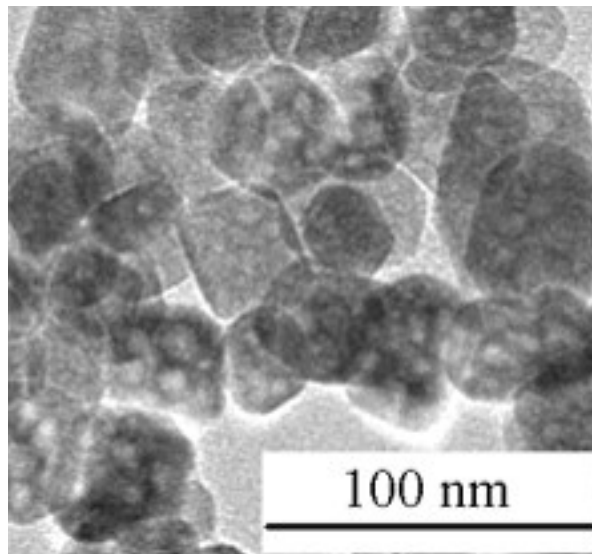

Figure S1. TEM image of nanoporous  $\text{Fe}_3\text{O}_4$ .

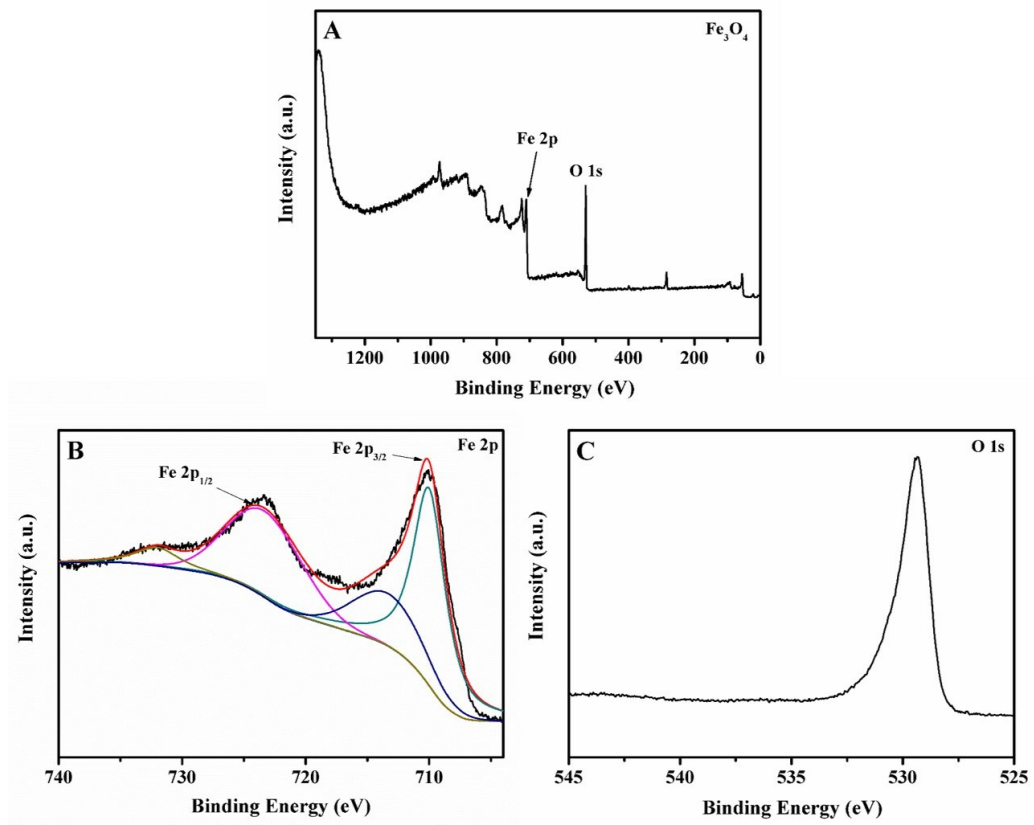

Figure S2. XPS spectrum of the nanoporous  $\text{Fe}_3\text{O}_4$  (A) in the Fe 2p (B) and O 1s (C) regions.

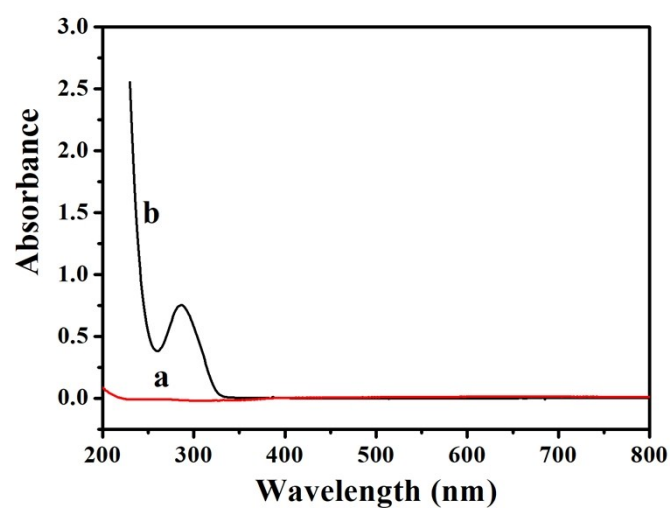

**Figure S3.** UV-vis spectroscopy of the nanoporous Fe<sub>3</sub>O<sub>4</sub> (a) and streptavidin-Fe<sub>3</sub>O<sub>4</sub> (b).

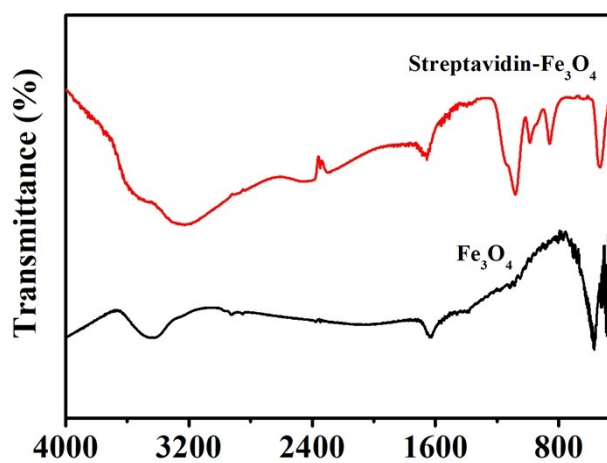

**Figure S4.** FTIR spectra of the nanoporous Fe<sub>3</sub>O<sub>4</sub> and streptavidin-Fe<sub>3</sub>O<sub>4</sub>.

Table S1 Results for the determination of ZEN in urine by the prepared immunosensor.

| Urine sample<br>(ng·mL <sup>-1</sup> ) | The addition<br>content<br>(ng·mL <sup>-1</sup> ) | The detection content (ng·mL <sup>-1</sup> ) | RSD<br>(%, <i>n</i> =5) | Recovery<br>(%) |
|----------------------------------------|---------------------------------------------------|----------------------------------------------|-------------------------|-----------------|
| 0.17                                   | 1.00                                              | 1.20, 1.15, 1.23, 1.11, 1.13                 | 4.3                     | 99.4            |
|                                        | 5.00                                              | 5.14, 4.83, 5.09, 5.10, 5.32                 | 3.4                     | 98.5            |
|                                        | 10.0                                              | 10.5, 10.7, 10.0, 9.84, 10.4                 | 3.5                     | 101             |
